# Supplementary material for: Two novel six-coordinated cadmium(ii) and zinc(ii) complexes from carbazate β-diketonate: crystal structures, enhanced two-photon absorption and biological imaging application
Source: Royal Society of Chemistry journal article supplement (doi:10.1039/c3dt51318a), 2013-09-24
Supplement: c3dt51318a.pdf [file c3dt51318a.pdf]

†Supplementary material

**Two novel six-coordinated cadmium (II) and zinc (II) complexes from carbazate  $\beta$ -diketonate: crystal structures, enhanced two-photon absorption and biological imaging application†**

Cuiyun Nie,<sup>‡a</sup> Qiong Zhang,<sup>‡a</sup> Hongjuan Ding,<sup>b</sup> Bei Huang,<sup>c</sup> Xinyan Wang,<sup>c</sup> Xianghua Zhao,<sup>a</sup> Shengli Li,<sup>a</sup> Hongping Zhou,<sup>a</sup> Jieying Wu,<sup>\*,a</sup> Yupeng Tian<sup>a,d,\*</sup>

[a] *Department of Chemistry, Key Laboratory of Functional Inorganic Materials Chemistry of Anhui Province, Anhui University, Hefei 230039, P. R. China* E-mail: [jywu1957@163.com](mailto:jywu1957@163.com); [yptian@ahu.edu.cn](mailto:yptian@ahu.edu.cn)

[b] *Department of Physics, Shandong Normal University, Jinan 250014, P. R. China*

[c] *Department of Biology, Anhui University, Hefei 230039, P. R. China*

[d] *State Key Laboratory of Coordination Chemistry, Nanjing University, Nanjing, 210093, P. R. China*

†*Dedicated to Professor Xiao-Zeng You for His 80<sup>th</sup> Birthday;*

‡*These authors contributed equally to this work.*

## Legands

**Fig. S1.** The variable temperature  $^1\text{H}$  NMR of  $\text{Zn(II)L}_2(\text{H}_2\text{O})_2$  has been measured in order to further prove the stability of the complex in DMSO.

**Fig. S2.** MALDI-TOF Mass spectrometry was used to further verify the stability of complex  $\text{Zn(II)L}_2(\text{H}_2\text{O})_2$  in water solution, which first dissolved in a small amount of DMF, and then diluted with water.

**Fig. S3.** The extended electron delocalization was confirmed by XPS from an experimental viewpoint. XPS result shows the atomic concentration sequence of O atom is  $\text{Cd(II)L}_2(\text{H}_2\text{O})_2$  (16.89)  $>$   $\text{Zn(II)L}_2(\text{H}_2\text{O})_2$  (13.78)  $>$  HL (12.12) which was in accordance with the electron delocalization tendency.

**Fig. S4.** The abbreviated diagram of MO theory.

**Fig. S5.** Enlarged diagrams of the molecular orbital of HL

**Fig. S6.** Computation results of the  $\text{Zn(II)L}_2(\text{H}_2\text{O})_2$

**Table S1** Crystal data and structure refinement for  $\text{Cd(II)L}_2(\text{H}_2\text{O})_2$  and  $\text{Zn(II)L}_2(\text{H}_2\text{O})_2$ .

**Table S2** Selected bond lengths (Å) and angles (°) for  $\text{Cd(II)L}_2(\text{H}_2\text{O})_2$  and  $\text{Zn(II)L}_2(\text{H}_2\text{O})_2$ .

**Table. S3.** TD-DFT computational studies were performed to elucidate the electronic structures of the ground state of HL,  $\text{Cd(II)L}_2(\text{H}_2\text{O})_2$  and  $\text{Zn(II)L}_2(\text{H}_2\text{O})_2$ .

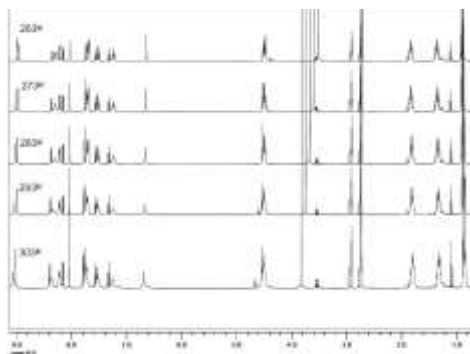

**Fig. S1.** Variable temperature <sup>1</sup>H NMR spectra of Zn(II)L<sub>2</sub>(H<sub>2</sub>O)<sub>2</sub>.

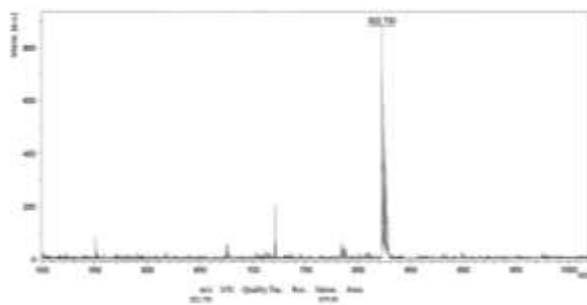

**Fig. S2.** MALDI-TOF mass spectra of Zn(II)L<sub>2</sub>(H<sub>2</sub>O)<sub>2</sub>.

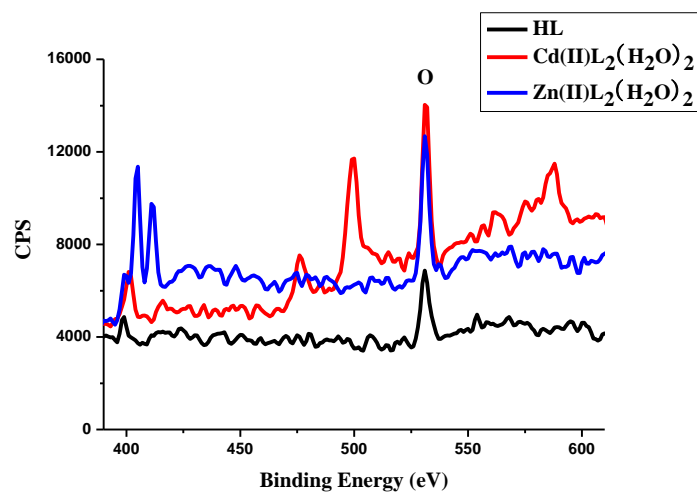

**Fig. S3.** XPS spectra of all the compounds

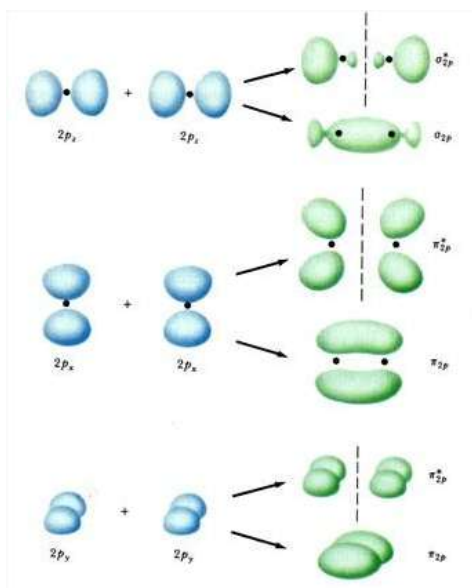

**Fig. S4.** The abbreviated diagram of MO theory.

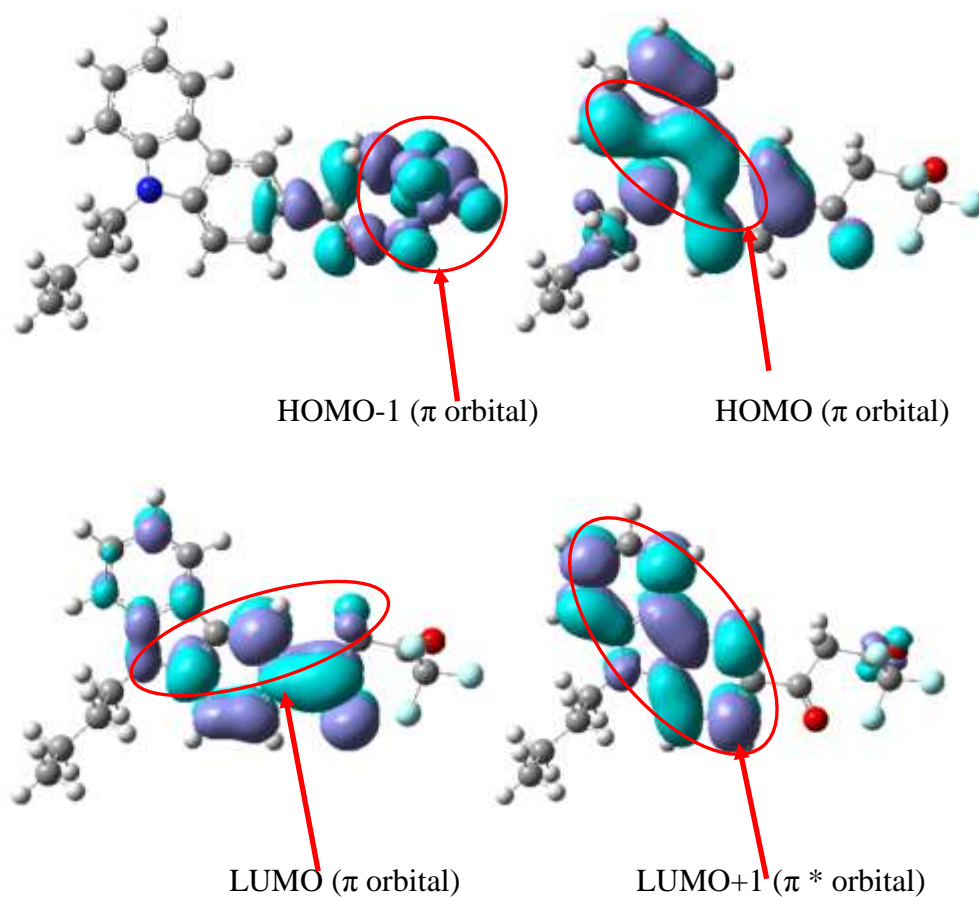

**Fig. S5.** Enlarged diagrams of the molecular orbital of HL

The figure shows the ORTEP diagram of the Zn(II)L<sub>2</sub>(H<sub>2</sub>O)<sub>2</sub> complex. The structure is displayed with displacement ellipsoids at the 50% probability level. The Zn atom is coordinated to two L ligands and two water molecules. A red circle highlights the Zn-O bond length of 2.143(4) Å.

**Fig. S6.** Computation results of the Zn(II)L<sub>2</sub>(H<sub>2</sub>O)<sub>2</sub>

**Table S1** Crystal data and structure refinement for Cd(II)L<sub>2</sub>(H<sub>2</sub>O)<sub>2</sub> and Zn(II)L<sub>2</sub>(H<sub>2</sub>O)<sub>2</sub>.

| Compound                          | Cd(II)L <sub>2</sub> (H <sub>2</sub> O) <sub>2</sub>          | Zn(II)L <sub>2</sub> (H <sub>2</sub> O) <sub>2</sub>          |
|-----------------------------------|---------------------------------------------------------------|---------------------------------------------------------------|
| Empirical formula                 | C <sub>40</sub> H <sub>38</sub> F <sub>6</sub> N <sub>2</sub> | C <sub>40</sub> H <sub>38</sub> F <sub>6</sub> N <sub>2</sub> |
|                                   | O <sub>4</sub> Cd                                             | O <sub>4</sub> Zn                                             |
| Formula weight                    | 869.12                                                        | 822.09                                                        |
| Crystal system                    | Monoclinic                                                    | Monoclinic                                                    |
| Space group                       | C2/c                                                          | C2/c                                                          |
| Temperature (K)                   | 293(2)                                                        | 273(2)                                                        |
| $\lambda$ of Mo-K $\alpha$ [Å]    | 0.71                                                          | 0.71                                                          |
| Absorption                        |                                                               |                                                               |
| coefficient[mm <sup>-1</sup> ]    | 0.06                                                          | 0.06                                                          |
| Unit cell dimensions              | a =39.67(9) Å                                                 | a =39.08(13) Å                                                |
|                                   | b=5.34(10) Å                                                  | b=5.27(2) Å                                                   |
|                                   | c =20.25(5)                                                   | c =20.21(6) Å                                                 |
|                                   | $\beta$ =104.29(2) °                                          | $\beta$ =103.91(2) °                                          |
| V [Å <sup>3</sup> ]               | 4158.47(16)                                                   | 4039.00(2)                                                    |
| Reflections collected             | 15154                                                         | 13298                                                         |
| Reflections unique                | 4752                                                          | 3527                                                          |
| R <sub>int</sub>                  | 0.0321                                                        | 0.0666                                                        |
| R <sub>1</sub>                    | 0.0646                                                        | 0.0932                                                        |
| wR <sub>2</sub>                   | 0.2065                                                        | 0.2804                                                        |
| Goodness of fit on F <sup>2</sup> | 1.080                                                         | 1.102                                                         |

**Table S2** Selected bond lengths (Å) and angles (°) for Cd(II)L<sub>2</sub>(H<sub>2</sub>O)<sub>2</sub> and Zn(II)L<sub>2</sub>(H<sub>2</sub>O)<sub>2</sub>.

| Cd(II)L <sub>2</sub> (H <sub>2</sub> O) <sub>2</sub> |          |                   |            |
|------------------------------------------------------|----------|-------------------|------------|
| Cd(1)-O(3)                                           | 2.361(3) | O(5)-Cd(1)-O(5)#1 | 180.00(11) |

|                                                        |          |                   |            |
|--------------------------------------------------------|----------|-------------------|------------|
| Cd(1)-O(5)                                             | 2.227(3) | O(5)-Cd(1)-O(6)   | 83.37(11)  |
| Cd(1)-O(6)                                             | 2.230(3) | O(5)-Cd(1)-O(6)#1 | 96.63(11)  |
| C(22)-C(23)                                            | 1.367    | O(5)-Cd(1)-O(3)#1 | 87.54(12)  |
| C(23)-C(24)                                            | 1.420    | O(5)-Cd(1)-O(3)   | 92.46(12)  |
| C(22)-O(6)                                             | 1.279    |                   |            |
| C(24)-O(5)                                             | 1.257    |                   |            |
| <b>Zn(II)L<sub>2</sub>(H<sub>2</sub>O)<sub>2</sub></b> |          |                   |            |
| Zn(1)-O(1)                                             | 2.053(5) | O(2)-Zn(1)-O(2)#1 | 180.00(17) |
| Zn(1)-O(2)                                             | 2.033(5) | O(2)-Zn(1)-O(1)#1 | 90.19(19)  |
| Zn(1)-O(3)                                             | 2.239(5) | O(2)-Zn(1)-O(1)   | 89.81(19)  |
| C(17)-C(18)                                            | 1.424    | O(2)-Zn(1)-O(3)#1 | 90.6(2)    |
| C(18)-C(19)                                            | 1.323    | O(2)-Zn(1)-O(3)   | 89.4(2)    |
| C(19)-O(2)                                             | 1.282    |                   |            |
| C(17)-O(1)                                             | 1.256    |                   |            |

**Table S3** Excitation energies (*E*), corresponding wavelengths ( $\lambda$ ), oscillator strengths (*f*) and major contributors for **HL**, **Cd(II)L<sub>2</sub>(H<sub>2</sub>O)<sub>2</sub>** and **Zn(II)L<sub>2</sub>(H<sub>2</sub>O)<sub>2</sub>**<sup>a</sup>. (<sup>a</sup> Only the transitions with a calculated oscillator strength higher than 0.0010 are reported.)

|                                                        | <i>E</i><br>(eV) | $\lambda$ (nm) | <i>f</i> | Composition                    | Character                       |
|--------------------------------------------------------|------------------|----------------|----------|--------------------------------|---------------------------------|
| <b>HL</b>                                              | 3.48             | 356.27         | 0.0009   | 93(H-1)→97(L+2)(0.6101<br>2)   | $\pi \rightarrow \pi^*$         |
|                                                        | 4.49             | 275.92         | 0.2032   | 94(H)→95 (L) (0.56918)         | $n \rightarrow \pi^*$           |
| <b>Cd(II)L<sub>2</sub>(H<sub>2</sub>O)<sub>2</sub></b> | 3.50             | 353.91         | 0.0011   | 202(H-1)→204(L)(0.5948<br>1)   | $\pi \rightarrow \pi^*$<br>MLCT |
|                                                        | 4.47             | 277.16         | 0.2742   | 202(H-1)→206(L+2)<br>(0.29774) | $n \rightarrow \pi^*$           |
| <b>Zn(II)L<sub>2</sub>(H<sub>2</sub>O)<sub>2</sub></b> | 3.95             | 351.00         | 0.0021   | 203(H)→204(L)(0.57055)         | $\pi \rightarrow \pi^*$<br>MLCT |
|                                                        | 4.37             | 283.63         | 0.0072   | 203(H)→207(L+3)<br>(0.60174)   | $n \rightarrow \pi^*$           |

According to the MO theory and the abbreviated diagram, we can clearly see that the  $\pi$  orbital was a distorted ellipsoid and the  $\pi^*$  orbital was a distorted ball. Hence, from the Figure 4 in the main text, the HOMOs (H) and H-1 of HL are of  $\pi$  orbitals localized on the carbazole and COCHC(OH)CF<sub>3</sub> groups. The unoccupied molecular orbitals LUMO (L) and L+1 are of the  $\pi^*$  orbital localized on carbazole and COCHC(OH)C<sub>6</sub>H<sub>5</sub> units which was in line with the MO theory. For complexes Zn(II)L<sub>2</sub>(H<sub>2</sub>O)<sub>2</sub> as an example, the d orbitals can hardly be intuitively from the diagram, however, the computation result can be provided to prove the metal ion hybridized d,s,p-orbitals. From Fig. S6, we can clearly see that the d-orbitals of Zn (II) has highest coefficient (218.21 and 118.99).
